# 1     **Impact of the World Inflammatory Bowel Disease Day and Crohn's & Colitis Awareness**

## 2     **Week on Population Interest between 2016 and 2020: Google Trends Analysis**

3

4     **Krixie Silangcruz, MD, MBA<sup>1</sup>, Yoshito Nishimura, MD, PhD, MPH<sup>1,2\*</sup>, Torrey Czech,**

5     **MD<sup>1</sup>, Nobuhiko Kimura, MD<sup>1</sup>, Hideharu Hagiya, MD, PhD<sup>2</sup>, Toshihiro Koyama, PhD<sup>3</sup>,**

6     **Fumio Otsuka, MD, PhD<sup>2</sup>**

7

8     <sup>1</sup>Department of Medicine, John A. Burns School of Medicine, University of Hawai'i,

9     Honolulu, HI, 96813, USA

10    <sup>2</sup>Department of General Medicine, Okayama University Graduate School of Medicine,

11    Dentistry and Pharmaceutical Sciences, Okayama, 7008558, Japan

12    <sup>3</sup>Department of Health Data Science, Graduate School of Medicine, Dentistry, and

13    Pharmaceutical Sciences, Okayama University, Okayama, 7008530, Japan

14

## 15    **Conflicts of interest**

16    The authors declare no conflicts of interest in association with the present study.

17

## 18    **Funding**

19    None

20

## 21 **Summary**

22 World IBD Day and Crohn's and Colitis Awareness Week are key health observances related  
23 to IBD. These observances, however, might not have been effective in raising public  
24 awareness of IBD in the US and worldwide, according to Google Trends analysis.

25

26 **\*Corresponding author:** Yoshito Nishimura, MD, PhD, MPH

27 Department of Medicine, John A. Burns School of Medicine, University of Hawai'i, Honolulu,  
28 HI, 96813, USA

29 E-mail: [nishimura-yoshito@okayama-u.ac.jp](mailto:nishimura-yoshito@okayama-u.ac.jp)

30

31

32

33

34

35

36

37

38

## 39 Abstract

40 **Background:** More than 6 million people are affected by inflammatory bowel disease (IBD)  
 41 globally. World IBD Day (WID; May 19) and Crohn’s and Colitis Awareness Week (CCAW;  
 42 December 1–7) occur yearly as national health observances to raise public awareness of IBD,  
 43 but their effects are unclear.

44 **Methods:** This study evaluates the impact of WID and CCAW on the public awareness of  
 45 IBD in the United States (US) and worldwide from 2016 to 2020 using the relative search  
 46 volume (RSV) of “IBD,” “Ulcerative colitis,” and “Crohn’s disease” in Google Trends (GT).  
 47 To identify significant timepoints of trend changes (joinpoints), we performed Joinpoint  
 48 regression analysis.

49 **Results:** No joinpoints were noted around the time of WID or CCAW during the study period  
 50 in the search results of the US. Worldwide, joinpoints were noted around WID in 2020 with  
 51 the search for “IBD” and around CAAW in 2017 and 2019 to search for “ulcerative colitis.”  
 52 However, the extents of trend changes were modest without statistically significant increases.

53 **Conclusions:** WID and CCAD may not have worked as expected to raise public awareness of  
 54 IBD. Additional measures are necessary to help raise awareness of IBD related to the health  
 55 observances.

56

**Keywords:** inflammatory bowel disease; ulcerative colitis; Crohn’s disease; google trends;  
trend analysis

## Introduction

Inflammatory bowel disease (IBD) is a global disease with an increasing prevalence in newly industrialized countries and rising cases documented in every continent<sup>1</sup>. Recent systematic reviews have demonstrated that IBD is occurring at increasing rates in such countries<sup>2</sup>. Globally in 2017, there were 6.8 million cases of IBD with an increased age-standardized prevalence rate from 1990 to 2017<sup>2</sup>. Within the United States, it was estimated that more than a million adult Americans had IBD<sup>3, 4</sup>.

Research into Inflammatory bowel disease, however, is largely under-represented despite its prevalence due to a multifactorial nature of the disease<sup>5</sup>. Global efforts have been made to raise awareness for IBD. In 2010, World IBD Day (WID) was created by the European Federation of Crohn’s and Ulcerative Colitis Associations and patient organizations to increase IBD awareness and provide education about IBD to the public<sup>6, 7</sup>. Similarly, Crohn’s and Colitis Awareness Week (CCAW) was created by an US Senate resolution in 2011, with goals of encouraging all people in the US to engage in activities aimed at raising awareness of IBD among the general public<sup>8</sup>.

75           Disease awareness and health promotion campaigns are created to increase public  
76   health education, awareness and, ultimately, change behavior<sup>9</sup>. Approximately 200 health  
77   awareness days, weeks, or months are on the US National Health Observances calendar<sup>10</sup>,  
78   and nearly 70% have been introduced after 2005. Despite the increasing number of awareness  
79   initiatives, there is a lack of data regarding evidence of their effectiveness and impact<sup>11</sup>. This  
80   lack of data highlights the need for greater evaluation and quantifiable metrics to determine  
81   the impact of health behaviors on a global scale.

82           Because online searches are a predominant source of access to  
83   health-awareness-related information, internet searches are a reflection of engagement  
84   between the public and resources which increase disease awareness. Searches are individual  
85   proxies for public disease awareness and provide insight into the effect of dissemination of  
86   information via global public health days and weeks. Google Trends (GT) is a novel,  
87   open-source, freely accessible resource that allows researchers to interact with search tools to  
88   study health phenomena<sup>12</sup>. An analysis regarding the efficacy and public health behaviors  
89   which resulted from IBD awareness initiatives has not been done previously. We aim to  
90   analyze the relationship between the WID or CCAW, and public health awareness for IBD  
91   through GT data.

## 92

## 93   **Methods**

## 94     **Data source**

95     GT is a data source generated from the total Google search data<sup>13</sup>. The data are available to  
 96     the public, and GT has been used in multiple social, public health, or global health research to  
 97     dig into the public attention<sup>14-25</sup>. Surrogate of the public attention in GT is the relative  
 98     popularity of specific search terms or topics in a certain category (for example, “health”),  
 99     place, and time range. The relative popularity is defined as a relative search volume (RSV)  
 100     with a scale of 0–100 (0 being the lowest popularity)<sup>14, 19-21</sup>. The RSV correlates with how  
 101     popular the terms are at a certain time point.

102

## 103     **Search Input**

104     **Fig. 1** is a summary of our search strategy with GT. We followed protocols noted by previous  
 105     studies<sup>17, 19, 21</sup>. We chose [Inflammatory bowel disease], [Ulcerative colitis], and [Crohn’s  
 106     disease] as search inputs. The location of the search included “United States” and  
 107     “Worldwide.”

108

## 109     **Search Variables**

110     To specifically obtain the popularity of the disease-related search inputs, all searches were  
 111     done with a ‘disease’ option in a Health category (with a “disease” option, search volumes of  
 112     subtopics or relevant themes are included). We chose each full year from 2016 to 2020 as

search scales to visualize weekly trends of the RSVs (each year contains 52 or 53 weeks; the WID occurred in the 20<sup>th</sup> week of 2016 to 2019, and the 19<sup>th</sup> week of 2020; CCAD occurred in the 48<sup>th</sup> to 49<sup>th</sup> week in 2016 to 2019 and the 49<sup>th</sup> to 50<sup>th</sup> week in 2020).

## Statistical analyses

We used a joinpoint regression model with the Joinpoint Regression Program (version 4.9.0.0, March 2021, Statistical Research and Applications Branch, National Cancer Institute, USA)<sup>26</sup> to analyze the RSV data and their time trend. The software enables us to identify time points called joinpoints, where a temporal trend significantly changes. We defined the analysis criteria to look for up to three joinpoints. The weekly percent changes (WPCs) between trend-change points were determined with 95% confidence intervals (CI). The threshold for statistical significance was defined as a  $p$ -value  $< 0.05$ , suggesting the level at which the slope differed from zero.

## Ethical Considerations

The publicly available data published by GT (Google LLC, Mountain View CA, USA) are utilized in the project. The study was approved by the institutional review board of Okayama University Hospital with a waiver for informed consent since the study intended to retrospectively analyze open data (No. 1910-009). All research methods were performed in

accordance with relevant guidelines and regulations.

## Results

### Trends in the search volume of “Inflammatory bowel disease”

**Table 1** and **Figure 2** describe trends and trend changes of the weekly RSVs for “Inflammatory bowel disease” in each full year from 2016 to 2020. With respect to the search results in the US, no joinpoints were observed throughout the period. Regarding the search results worldwide, there was a joinpoint at the 45<sup>th</sup> week in 2019 before which a significant increase in the WPC of 0.2% (95% CI; 0.1–0.4) was observed. In 2020, a joinpoint was noted at the 17<sup>th</sup> week (3 weeks before WID), after which there was a significant weekly increase in the RSV by 0.3% ( $p < 0.001$ ). Also, the third joinpoint was observed in the 48<sup>th</sup> week (a week prior to CCAD). However, no joinpoints were noted from 2015 to 2018 around the time of WID or CCAW.

### Trends in the search volume of “Ulcerative colitis”

**Table 2** and **Figure 3** describe trends and trend changes of the weekly RSVs for “Ulcerative colitis” in the designated period. In the search results of the US and worldwide, a big surge was observed at the 3<sup>rd</sup> week in 2016. In 2020, a joinpoint was noted at the 16<sup>th</sup> week (4 weeks before WID), after which a non-statistically significant but considerable weekly RSV



increase by 3.7% ( $p < 0.001$ ) was observed until 24<sup>th</sup> week. For worldwide results, there was a prominent joinpoint in the 49<sup>th</sup> week (CCAW) in 2017. No other joinpoints were observed around the time of WID or CCAW in 2016 or 2018 to 2020.

## **Trends in the search volume of “Crohn’s disease”**

**Table 3** and **Figure 4** describe trends and trend changes of the weekly RSVs for “Crohn’s disease” in the designated period. Between 2017 and 2019, there was no remarkable trend change in both the US and worldwide. In 2020, joinpoints on the 8<sup>th</sup> week, the 16<sup>th</sup> week, and the 24<sup>th</sup> week in the US. For worldwide, joinpoints were observed on the 10<sup>th</sup> week, the 14<sup>th</sup> week, and the 24<sup>th</sup> week. However, there were no joinpoints around the time of WID or CCAW throughout the period.

## **Discussion**

This study evaluated how the global campaign for promoting IBD, such as WIB and CCAW, affected public awareness using the RSVs of GT data as a surrogate. Although there were several significant joinpoints for IBD, Crohn’s disease, and ulcerative colitis, overall, the present results showed that WID and CCAW might not have significant impact on the public interest in the US and worldwide. Rather, the public interest seems to have been affected by timely topics. For example, at the 3<sup>rd</sup> week of 2016 when there was a significant

increase in the RSV of ulcerative colitis in the US, a famous US singer-songwriter reportedly passed away due to the disease. In March 2020, when significant trend changes were observed in the US and worldwide, a well-known American comedian revealed that he had had Crohn's disease. Similarly, when the same comedian was featured in a film about a man who has Crohn's disease in June 2020, there were trend changes both in the US and worldwide (the 24<sup>th</sup> week). Only in 2017 worldwide, considerable trend changes in the RSVs for ulcerative colitis was noted around CAAW, although the WPC was not statistically significant. Given the rapid increase in the global prevalence of IBD with increasing healthcare costs, raising public awareness of IBD is a pressing global health issue. While one would think that people may be more aware of IBD given the rising number of IBD cases worldwide, more efforts are needed in this aspect.

Since 2020, the dramatic challenges of the coronavirus disease 2019 (COVID-19) pandemic greatly affected our lives, which may have affected the public interests for IBD as well. Because immunocompromised patients may be vulnerable to COVID-19, there were concerns whether IBD patients might be more susceptible to COVID-19 and have worse outcomes<sup>27</sup>. In a cross-sectional questionnaire, patients with IBD were apprehensive about the COVID-19 pandemic, as they felt more vulnerable to COVID-19 due to their condition and their immunosuppressive therapies including biologics. Many patients also felt disturbed, tense when thinking of the infection, and depressed<sup>28</sup>. To provide solid supports for IBD patients

during the pandemic, further efforts to increase the public awareness toward the entity is crucial.

The IBD landscape is constantly evolving with the hope as more therapies are discovered, it makes global awareness campaigns even critical. It is crucial to address the essential priorities regarding IBD awareness. There are various ways that campaign organizers can utilize to build awareness and deepen engagement amongst the target audience, not only the general public but also people with IBD, their families, friends, employers, and healthcare providers. Any topic related to treatment always provides positive discussion points and direction to campaign programs. Activities during WID and CCAW and information about the organization itself should be the go-to resource for anything related to IBD. One example of a successful public health awareness campaigns include the annual breast cancer awareness campaign<sup>29</sup>. In order to make public health campaigns more successful, appropriate identification of targets, early involvement of key stakeholders such as celebrities with IBD, and enabling participants to feel part of the campaign using smartphone applications or eHealth platforms may be effective<sup>30</sup>. We encourage societies or organizations associated with WID or CCAW to take actions with features above in mind to improve the effectiveness of these campaigns.

The study's strength includes that this is the first study to show the public awareness of IBD in the US and worldwide using the GT database. Using the open data, we could

quantify the current trends of general awareness in IBD. However, several limitations need to be addressed. First, due to the nature of GT, the present results only included results from those who had internet access and sought health-related information via Google search. Given high internet penetration rates, approximately 90.4% in Northern America and 60.1% worldwide<sup>31</sup>, and high US google search market share, approximately 83%<sup>32</sup>, GT is considered a good surrogate of public awareness. Second, GT lacks full transparency and reproducibility because non-public mathematical assumptions define RSVs. We documented our search strategy in detail to address the limitation. Despite these limitations, our approach is interestingly novel to demonstrate campaign effectiveness or ineffectiveness in public awareness of IBD.

In conclusion, our study suggested that WIB and CCAW might have not been successful to improve public awareness toward IBD using the GT data as a surrogate. There is a need to look deeper into the issues surrounding IBD and how to improve public awareness using these health observances based on good examples including the annual breast cancer awareness campaign.

## Acknowledgments

None.

## 227    **Author Contributions**

228    KS, TC, and NK wrote the manuscript. YN proposed the study concept, designed the study,  
 229    wrote the manuscript, and analyzed the data. HH and TK revised the manuscript critically. FO  
 230    supervised the research.

231

232

233

234

235

236

237

238

239

240

241

242

243

244

245

## References

- 1 Kaplan GG. The global burden of IBD: from 2015 to 2025. *Nat Rev Gastroenterol Hepatol.* 2015;12(12):720-727.
- 2 Collaborators GBDIBD. The global, regional, and national burden of inflammatory bowel disease in 195 countries and territories, 1990-2017: a systematic analysis for the Global Burden of Disease Study 2017. *Lancet Gastroenterol Hepatol.* 2020;5(1):17-30.
- 3 Ye Y, Manne S, Bennett D. Prevalence of Inflammatory Bowel Disease in the U.S. Adult Population: Recent Estimates from Large Population-Based National Databases: 654. *Official journal of the American College of Gastroenterology / ACG.* 2018;113:S373-S374.
- 4 Xu F, Carlson SA, Liu Y, Greenlund KJ. Prevalence of Inflammatory Bowel Disease Among Medicare Fee-For-Service Beneficiaries - United States, 2001-2018. *MMWR Morb Mortal Wkly Rep.* 2021;70(19):698-701.
- 5 Ananthakrishnan AN, Bernstein CN, Iliopoulos D, et al. Environmental triggers in IBD: a review of progress and evidence. *Nat Rev Gastroenterol Hepatol.* 2018;15(1):39-49.
- 6 Announcement: World IBD Day - May 19, 2017. *MMWR Morb Mortal Wkly Rep.* 2017;66(19):516.
- 7 Crohns & Colitis Foundation. Take Action for World IBD Day! , Vol. 2021, 2021
- 8 The United States Congress. S. RES. 199 Supporting the goals and ideals of “Crohn’s and Colitis Awareness Week”. Vol. 2021, 2011

265 9 Purtle J, Roman LA. Health awareness days: sufficient evidence to support the  
266 craze? *Am J Public Health*. 2015;105(6):1061-1065.

267 10 U.S. Department of Health and Human Services. National Health Observances. Vol.  
268 2021, 2021

269 11 Wakefield MA, Loken B, Hornik RC. Use of mass media campaigns to change  
270 health behaviour. *Lancet*. 2010;376(9748):1261-1271.

271 12 Nuti SV, Wayda B, Ranasinghe I, et al. The use of google trends in health care  
272 research: a systematic review. *PLoS One*. 2014;9(10):e109583.

273 13 LLC G. Google Trends. Vol. 2021, 2021

274 14 Motosko C, Zakhem G, Ho R, Saadeh P, Hazen A. Using Google to Trend Patient  
275 Interest in Botulinum Toxin and Hyaluronic Acid Fillers. *J Drugs Dermatol*.  
276 2018;17(11):1245-1246.

277 15 Frauenfeld L, Nann D, Sulyok Z, Feng YS, Sulyok M. Forecasting tuberculosis  
278 using diabetes-related google trends data. *Pathog Glob Health*. 2020;114(5):236-241.

279 16 Patel JC, Khurana P, Sharma YK, Kumar B, Ragumani S. Chronic lifestyle diseases  
280 display seasonal sensitive comorbid trend in human population evidence from Google Trends.  
281 *PLoS One*. 2018;13(12):e0207359.

282 17 Tabuchi T, Fukui K, Gallus S. Tobacco Price Increases and Population Interest in  
283 Smoking Cessation in Japan Between 2004 and 2016: A Google Trends Analysis. *Nicotine*

284 *Tob Res.* 2019;21(4):475-480.

285 18 Cacciamani GE, Bassi S, Sebben M, et al. Consulting "Dr. Google" for Prostate  
286 Cancer Treatment Options: A Contemporary Worldwide Trend Analysis. *Eur Urol Oncol.*  
287 2020;3(4):481-488.

288 19 Havelka EM, Mallen CD, Shepherd TA. Using Google Trends to assess the impact  
289 of global public health days on online health information seeking behaviour in Central and  
290 South America. *J Glob Health.* 2020;10(1):010403.

291 20 Patel JC, Khurana P, Sharma YK, Kumar B, Sugadev R. Google trend analysis of  
292 climatic zone based Indian severe seasonal sensitive population. *BMC Public Health.*  
293 2020;20(1):306.

294 21 Peng Y, Li C, Rong Y, Chen X, Chen H. Retrospective analysis of the accuracy of  
295 predicting the alert level of COVID-19 in 202 countries using Google Trends and machine  
296 learning. *J Glob Health.* 2020;10(2):020511.

297 22 Russo GI, di Mauro M, Cocci A, et al. Consulting "Dr Google" for sexual  
298 dysfunction: a contemporary worldwide trend analysis. *Int J Impot Res.* 2020;32(4):455-461.

299 23 Sharma M, Sharma S. The Rising Number of COVID-19 Cases Reflecting Growing  
300 Search Trend and Concern of People: A Google Trend Analysis of Eight Major Countries. *J*  
301 *Med Syst.* 2020;44(7):117.

302 24 Brodeur A, Clark AE, Fleche S, Powdthavee N. COVID-19, lockdowns and



303 well-being: Evidence from Google Trends. *J Public Econ.* 2021;193:104346.

304 25 Zitting KM, Lammers-van der Holst HM, Yuan RK, Wang W, Quan SF, Duffy JF.

305 Google Trends reveals increases in internet searches for insomnia during the 2019

306 coronavirus disease (COVID-19) global pandemic. *J Clin Sleep Med.* 2021;17(2):177-184.

307 26 National Cancer Institute. Joinpoint Trend Analysis Software. Vol. 2021, 2021

308 27 Nakase H, Matsumoto T, Matsuura M, et al. Expert Opinions on the Current

309 Therapeutic Management of Inflammatory Bowel Disease during the COVID-19 Pandemic:

310 Japan IBD COVID-19 Taskforce, Intractable Diseases, the Health and Labor Sciences

311 Research. *Digestion.* 2020.

312 28 Zingone F, Siniscalchi M, Savarino EV, et al. Perception of the COVID-19 Pandemic

313 Among Patients With Inflammatory Bowel Disease in the Time of Telemedicine:

314 Cross-Sectional Questionnaire Study. *J Med Internet Res.* 2020;22(11):e19574.

315 29 Glynn RW, Kelly JC, Coffey N, Sweeney KJ, Kerin MJ. The effect of breast cancer

316 awareness month on internet search activity - a comparison with awareness campaigns for

317 lung and prostate cancer. *BMC Cancer.* 2011;11(1):442.

318 30 Seymour J. The Impact of Public Health Awareness Campaigns on the Awareness

319 and Quality of Palliative Care. *Journal of Palliative Medicine.* 2018;21(S1):S-30-S-36.

320 31 Statista. Global internet penetration rate as of April 2021, by region. Vol. 2021, 2021

321 32 Statista. Google: search engine market share in selected countries 2021. Vol. 2021,

322 2021

323

324 **Table 1. Trend changes in relative search volumes of “Inflammatory bowel disease”, 2016–2020**

| Country/Year   | Period 1 |                    | Period 2 |                  | Period 3 |                  | Period 4 |                   |
|----------------|----------|--------------------|----------|------------------|----------|------------------|----------|-------------------|
|                | Weeks    | WPC (%) [95% CI]   | Weeks    | WPC (%) [95% CI] | Weeks    | WPC (%) [95% CI] | Weeks    | WPC (%) [95% CI]  |
| US/2016        | 1–52     | –0.1 [–0.4, 0.2]   |          |                  |          |                  |          |                   |
| US/2017        | 1–53     | –0.2 [–0.5, 0.1]   |          |                  |          |                  |          |                   |
| US/2018        | 1–52     | –0.2 [–0.5, 0.2]   |          |                  |          |                  |          |                   |
| US/2019        | 1–52     | –0.3* [–0.6, 0]    |          |                  |          |                  |          |                   |
| US/2020        | 1–52     | 0.1 [–0.2, 0.4]    |          |                  |          |                  |          |                   |
| Worldwide/2016 | 1–52     | 0 [–0.2, 0.2]      |          |                  |          |                  |          |                   |
| Worldwide/2017 | 1–53     | 0 [–0.2, 0.1]      |          |                  |          |                  |          |                   |
| Worldwide/2018 | 1–52     | 0 [–0.2, 0.2]      |          |                  |          |                  |          |                   |
| Worldwide/2019 | 1–45     | 0.2* [0.1, 0.4]    | 45–52    | –2.6 [–5.4, 0.3] |          |                  |          |                   |
| Worldwide/2020 | 1–13     | –2.5* [–3.6, –1.4] | 13–17    | 4.6 [–4.9, 15]   | 17–48    | 0.3* [0, 0.6]    | 48–52    | –5.4 [–10.9, 0.5] |

325 \* Significantly different from zero (p <0.05)

326 Abbreviations: WPC, weekly percentage change, CI; confidence interval

327 Periods were separated as Period 1–4, when the trend changes were statistically detected in the Joinpoint regression analysis during the study period.

328

329 **Table 2. Trend changes in relative search volumes of “Ulcerative colitis”, 2016–2020**

| Country/Year   | Period 1 |                     | Period 2 |                    | Period 3 |                     |
|----------------|----------|---------------------|----------|--------------------|----------|---------------------|
|                | Weeks    | WPC (%) [95% CI]    | Weeks    | WPC (%) [95% CI]   | Weeks    | WPC (%) [95% CI]    |
| US/2016        | 1–3      | 80.2* [40.1, 131.8] | 3–6      | –19.5 [–37.4, 3.6] | 6–52     | –0.2* [–0.4, 0]     |
| US/2017        | 1–53     | 0.2 [0, 0.4]        |          |                    |          |                     |
| US/2018        | 1–52     | 0.1 [–0.1, 0.3]     |          |                    |          |                     |
| US/2019        | 1–52     | –0.3* [–0.4, –0.1]  |          |                    |          |                     |
| US/2020        | 1–16     | –2.8* [–4.0, –1.6]  | 16–24    | 3.7 [–0.3, 7.8]    | 24–52    | –0.5 [–0.9, 0]      |
| Worldwide/2016 | 1–52     | –0.3* [–0.6, –0.1]  |          |                    |          |                     |
| Worldwide/2017 | 1–46     | 0.1 [0, 0.2]        | 46–49    | 5.7 [–6.5, 19.6]   | 49–53    | –7.9* [–11.5, –4.3] |
| Worldwide/2018 | 1–52     | 0 [–0.1, 0.1]       |          |                    |          |                     |
| Worldwide/2019 | 1–46     | 0 [–0.1, 0.1]       | 46–52    | –2.1 [–4.5, 0.3]   |          |                     |
| Worldwide/2020 | 1–52     | 0 [–0.4, 0.3]       |          |                    |          |                     |

330 \* Significantly different from zero (p <0.05)

331 Abbreviations: WPC, weekly percentage change, CI; confidence interval

332 Periods were separated as Period 1–4, when the trend changes were statistically detected in the Joinpoint regression analysis during the study period.

333

334 **Table 3. Trend changes in relative search volumes of “Crohn’s disease”, 2016–2020**

| Country/Year   | Period 1 |                   | Period 2 |                     | Period 3 |                  | Period 4 |                  |
|----------------|----------|-------------------|----------|---------------------|----------|------------------|----------|------------------|
|                | Weeks    | WPC (%) [95% CI]  | Weeks    | WPC (%) [95% CI]    | Weeks    | WPC (%) [95% CI] | Weeks    | WPC (%) [95% CI] |
| US/2016        | 1–52     | 0.1 [–0.1, 0.3]   |          |                     |          |                  |          |                  |
| US/2017        | 1–53     | 0.1 [–0.1, 0.2]   |          |                     |          |                  |          |                  |
| US/2018        | 1–52     | 0.1 [–0.2, 0.4]   |          |                     |          |                  |          |                  |
| US/2019        | 1–39     | 0 [–0.3, 0.2]     | 39–52    | –1.5* [–2.8, –0.3]  |          |                  |          |                  |
| US/2020        | 1–8      | 2.3 [–0.4, 5.1]   | 8–16     | –4.5* [–7.0, –1.9]  | 16–24    | 2.9* [0.2, 5.7]  | 24–52    | 0.1 [–0.3, 0.4]  |
| Worldwide/2016 | 1–52     | 0 [–0.1, 0.1]     |          |                     |          |                  |          |                  |
| Worldwide/2017 | 1–53     | 0 [–0.1, 0.1]     |          |                     |          |                  |          |                  |
| Worldwide/2018 | 1–52     | –0.1 [–0.3, 0.1]  |          |                     |          |                  |          |                  |
| Worldwide/2019 | 1–52     | –0.2 [–0.3, –0.1] |          |                     |          |                  |          |                  |
| Worldwide/2020 | 1–10     | 2.2* [0.6, 3.8]   | 10–14    | –8.7* [–16.4, –0.4] | 14–24    | 1.2 [–0.4, 2.8]  | 24–52    | –0.2 [–0.5, 0.1] |

335 \* Significantly different from zero (p <0.05)

336 Abbreviations: WPC, weekly percentage change, CI; confidence interval

337 Periods were separated as Period 1–4, when the trend changes were statistically detected in the Joinpoint regression analysis during the study period.

## Figure legends

### Figure 1. Searching flow using Google Trends

### Figure 2. Trends in the relative search volume of “Inflammatory bowel disease,” 2016–2020

Weekly relative search volumes (RSVs) for the search term “Inflammatory bowel disease” are described. World IBD Day (WID) occurred in the 20th week of 2016 to 2019 and the 19th week of 2020; Crohn’s & Colitis Awareness Week (CCAW) occurred in the 48th to 49th week in 2016 to 2019 and the 49th to 50th week in 2020). The number of slopes is determined by the number of joinpoints identified by the analysis. Joinpoints are the time points when statistically significant changes in the linear slopes are noted.

### Figure 3. Trends in the relative search volume of “Ulcerative colitis,” 2016–2020

Weekly RSVs for the search term “Ulcerative colitis.” Except for the 16th week (4 weeks before WID) in the US and the 49th week (CCAW) worldwide in 2020, no other joinpoints were noted around the time of WID or CCAW during the designated period.

### Figure 4. Trends in the relative search volume of “Crohn’s disease,” 2016–2020

Weekly RSVs for the search term “Crohn’s disease.” No joinpoints were noted around the

357 time of WID or CCAW throughout the period.

Figure 1

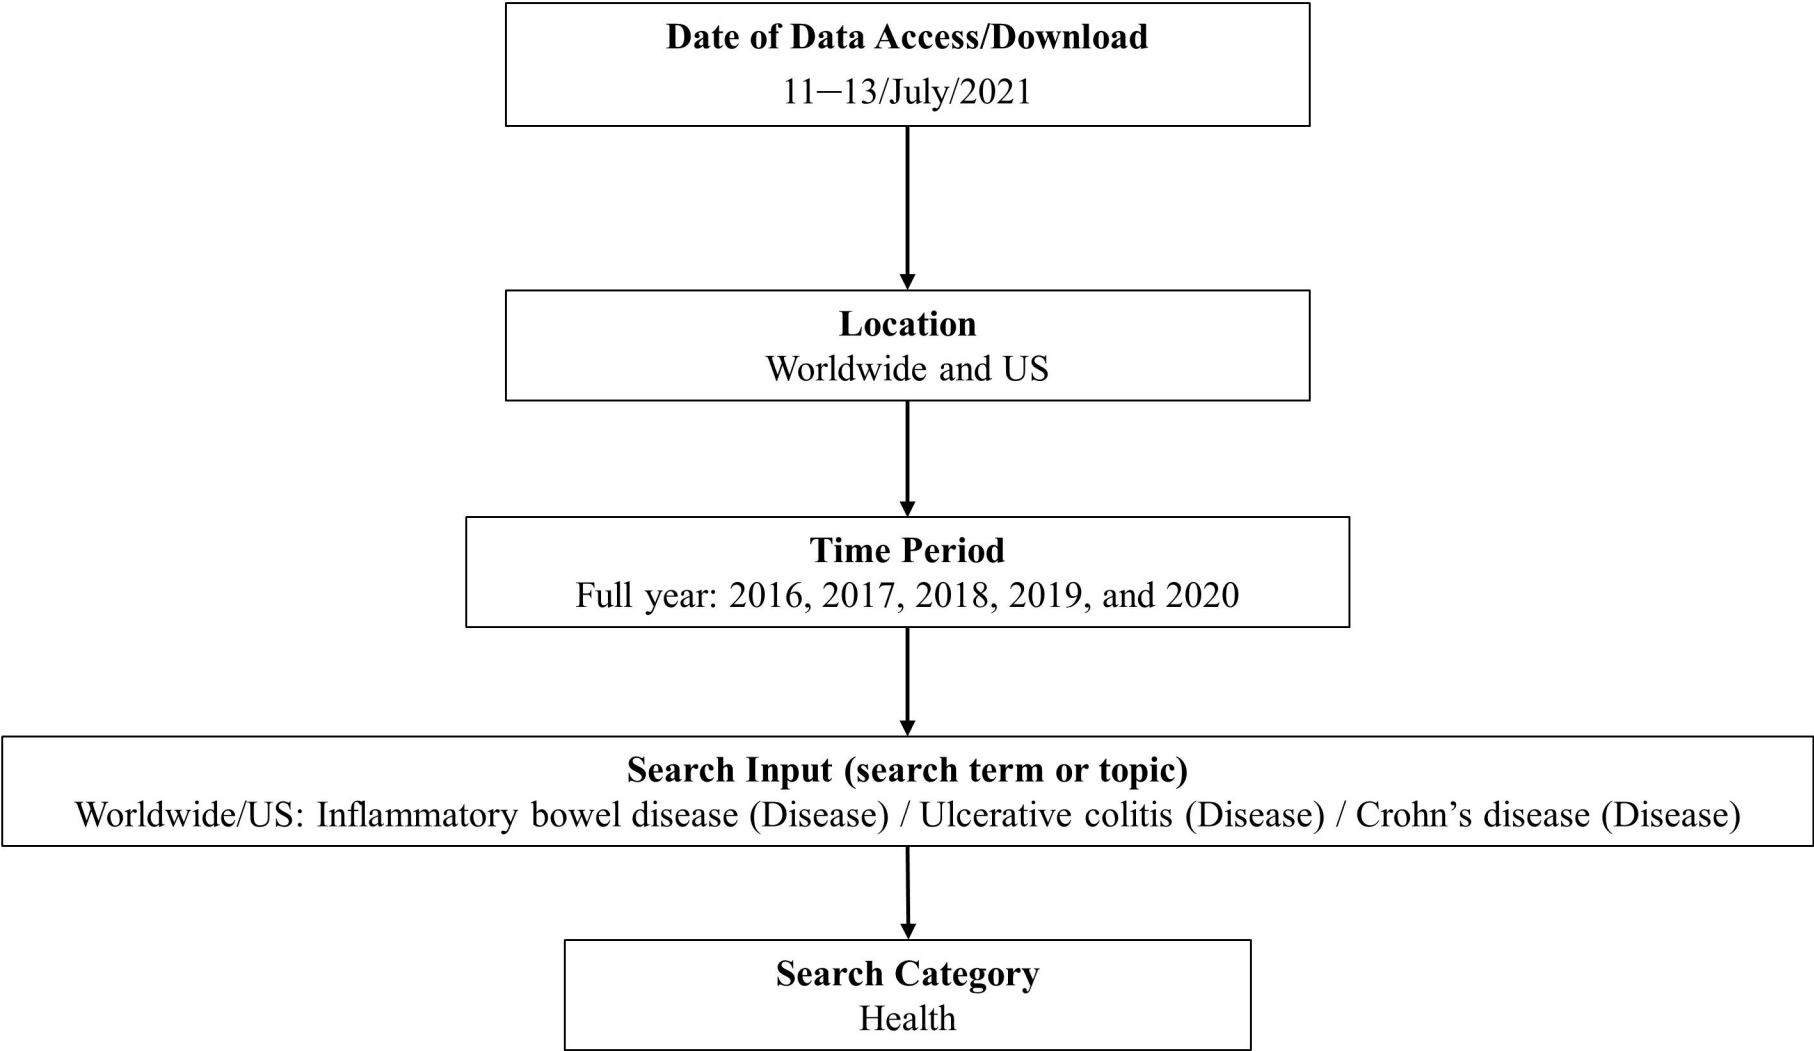



Figure 2

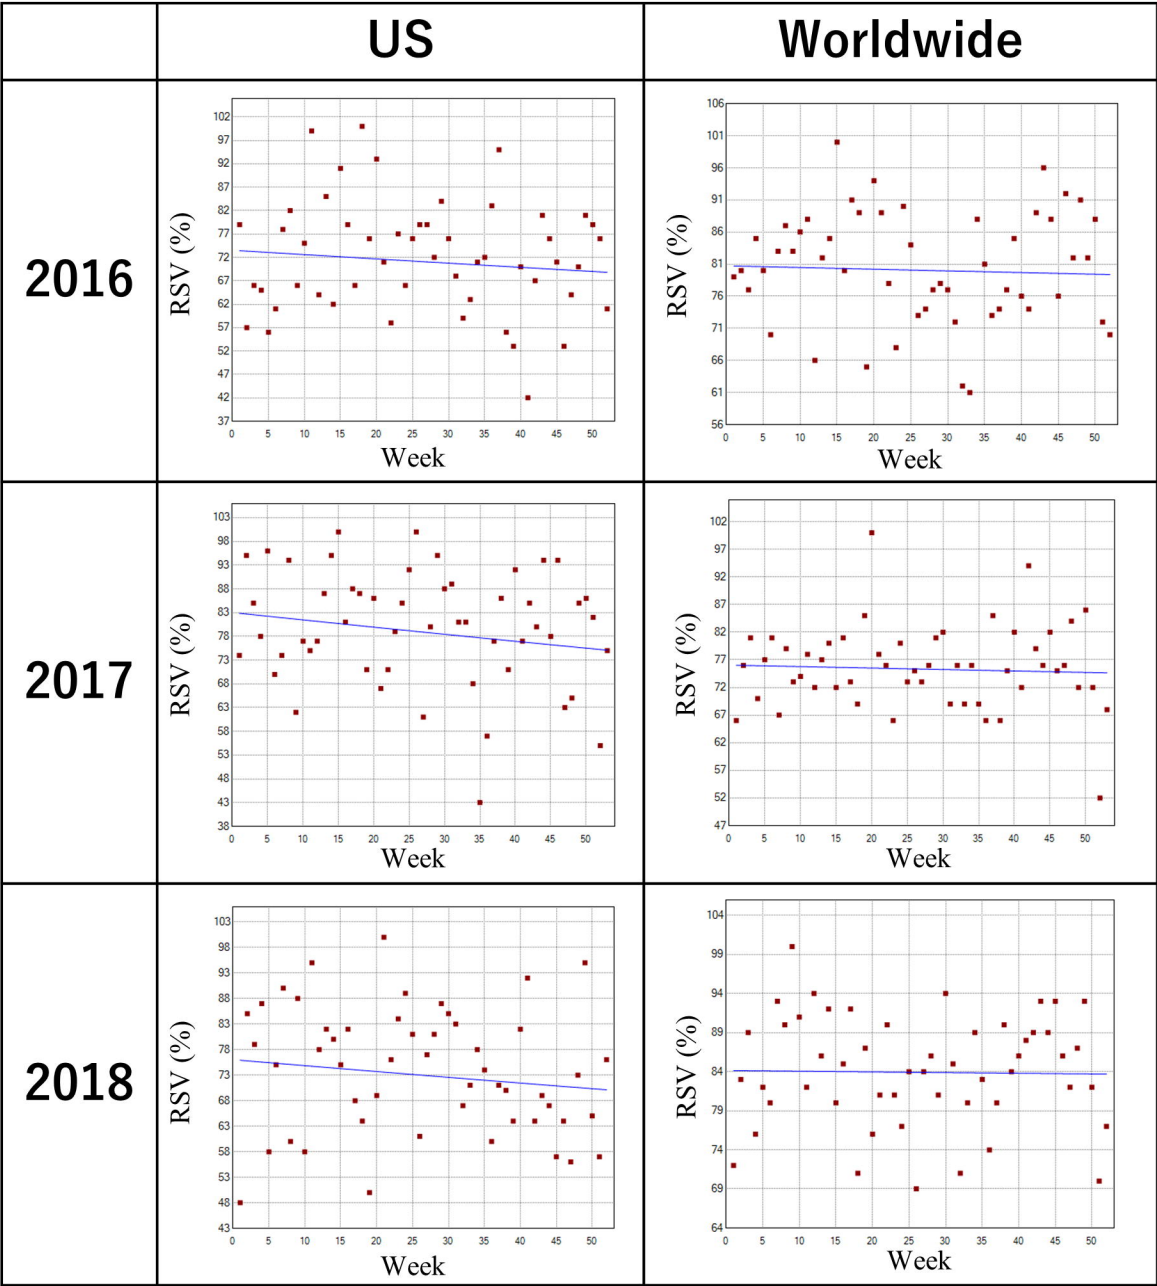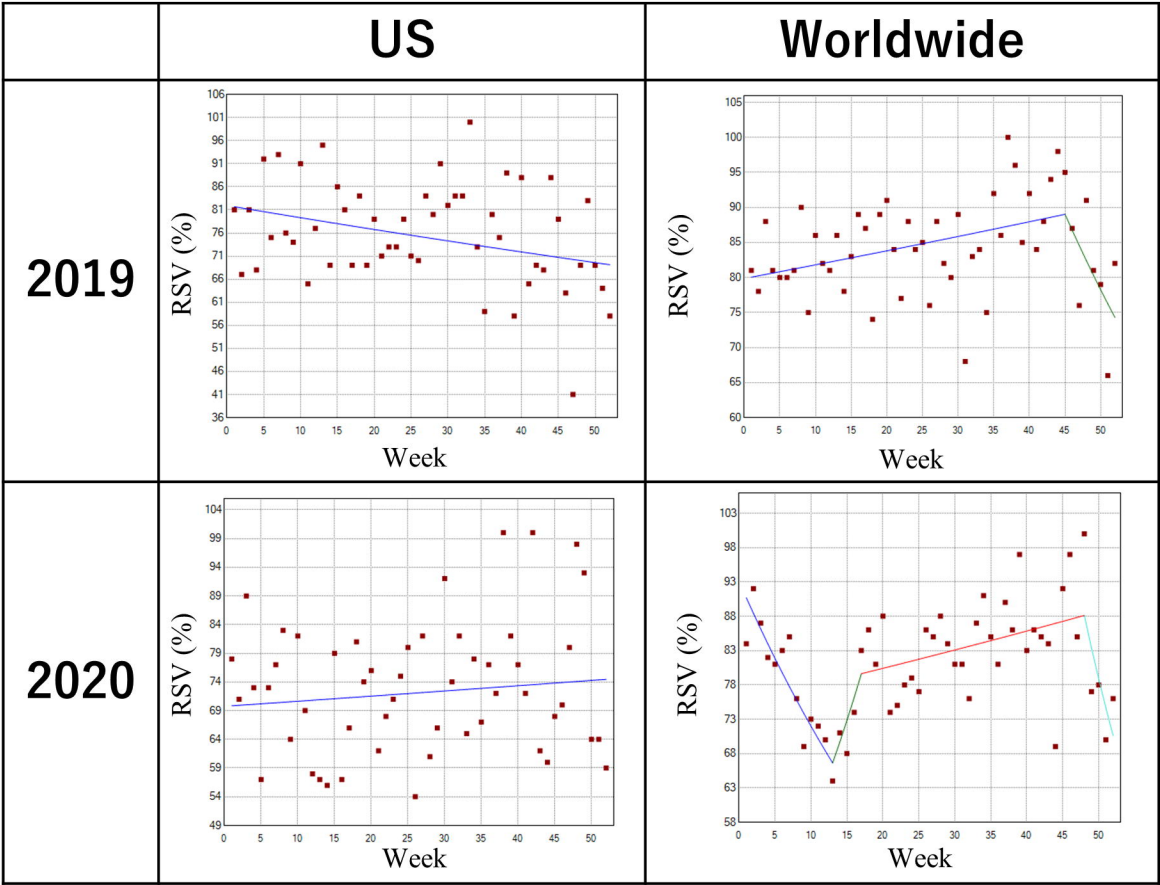

Figure 3

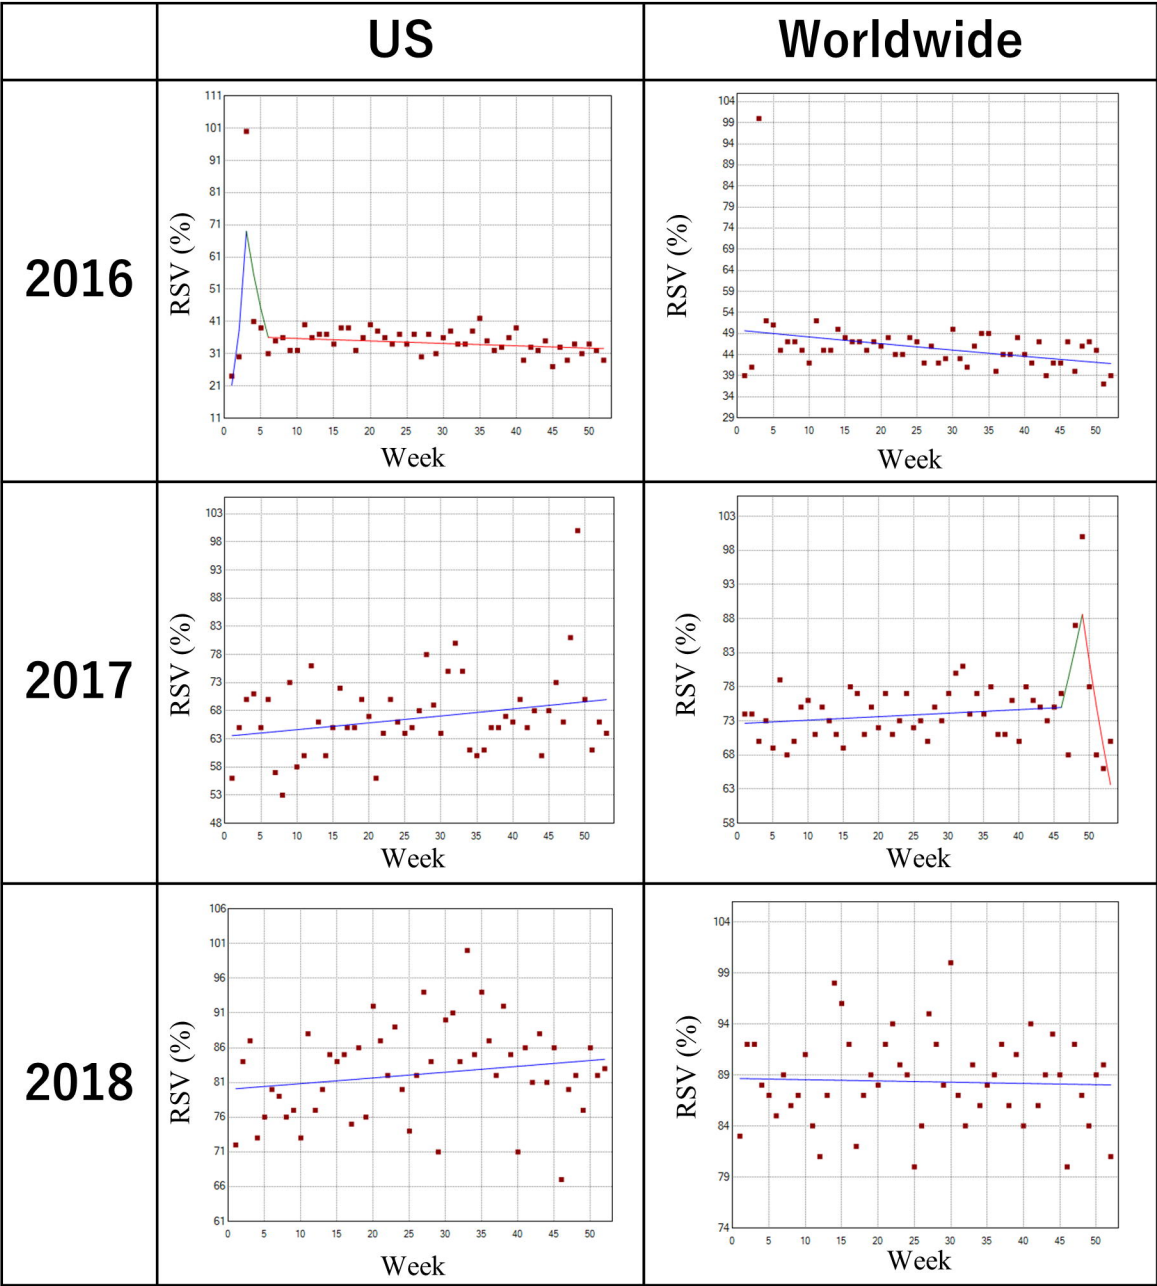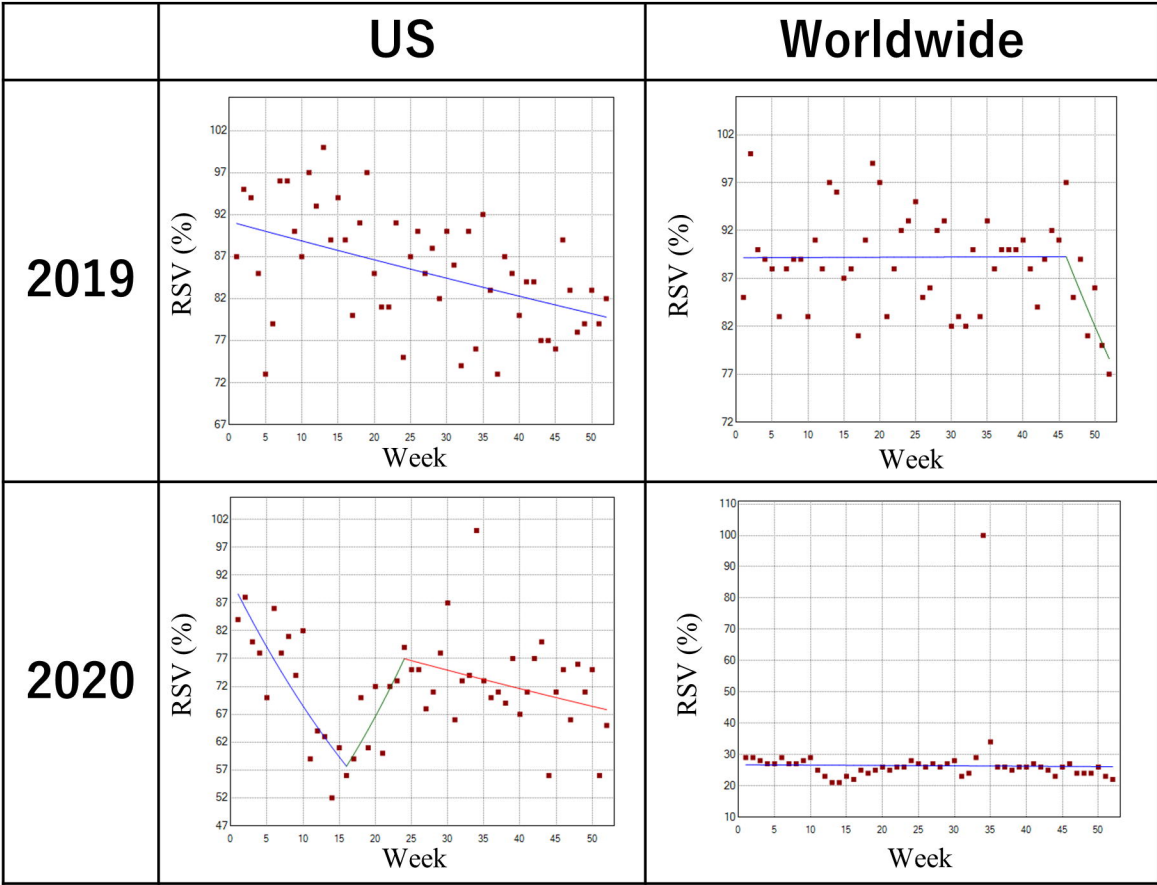

Figure 4

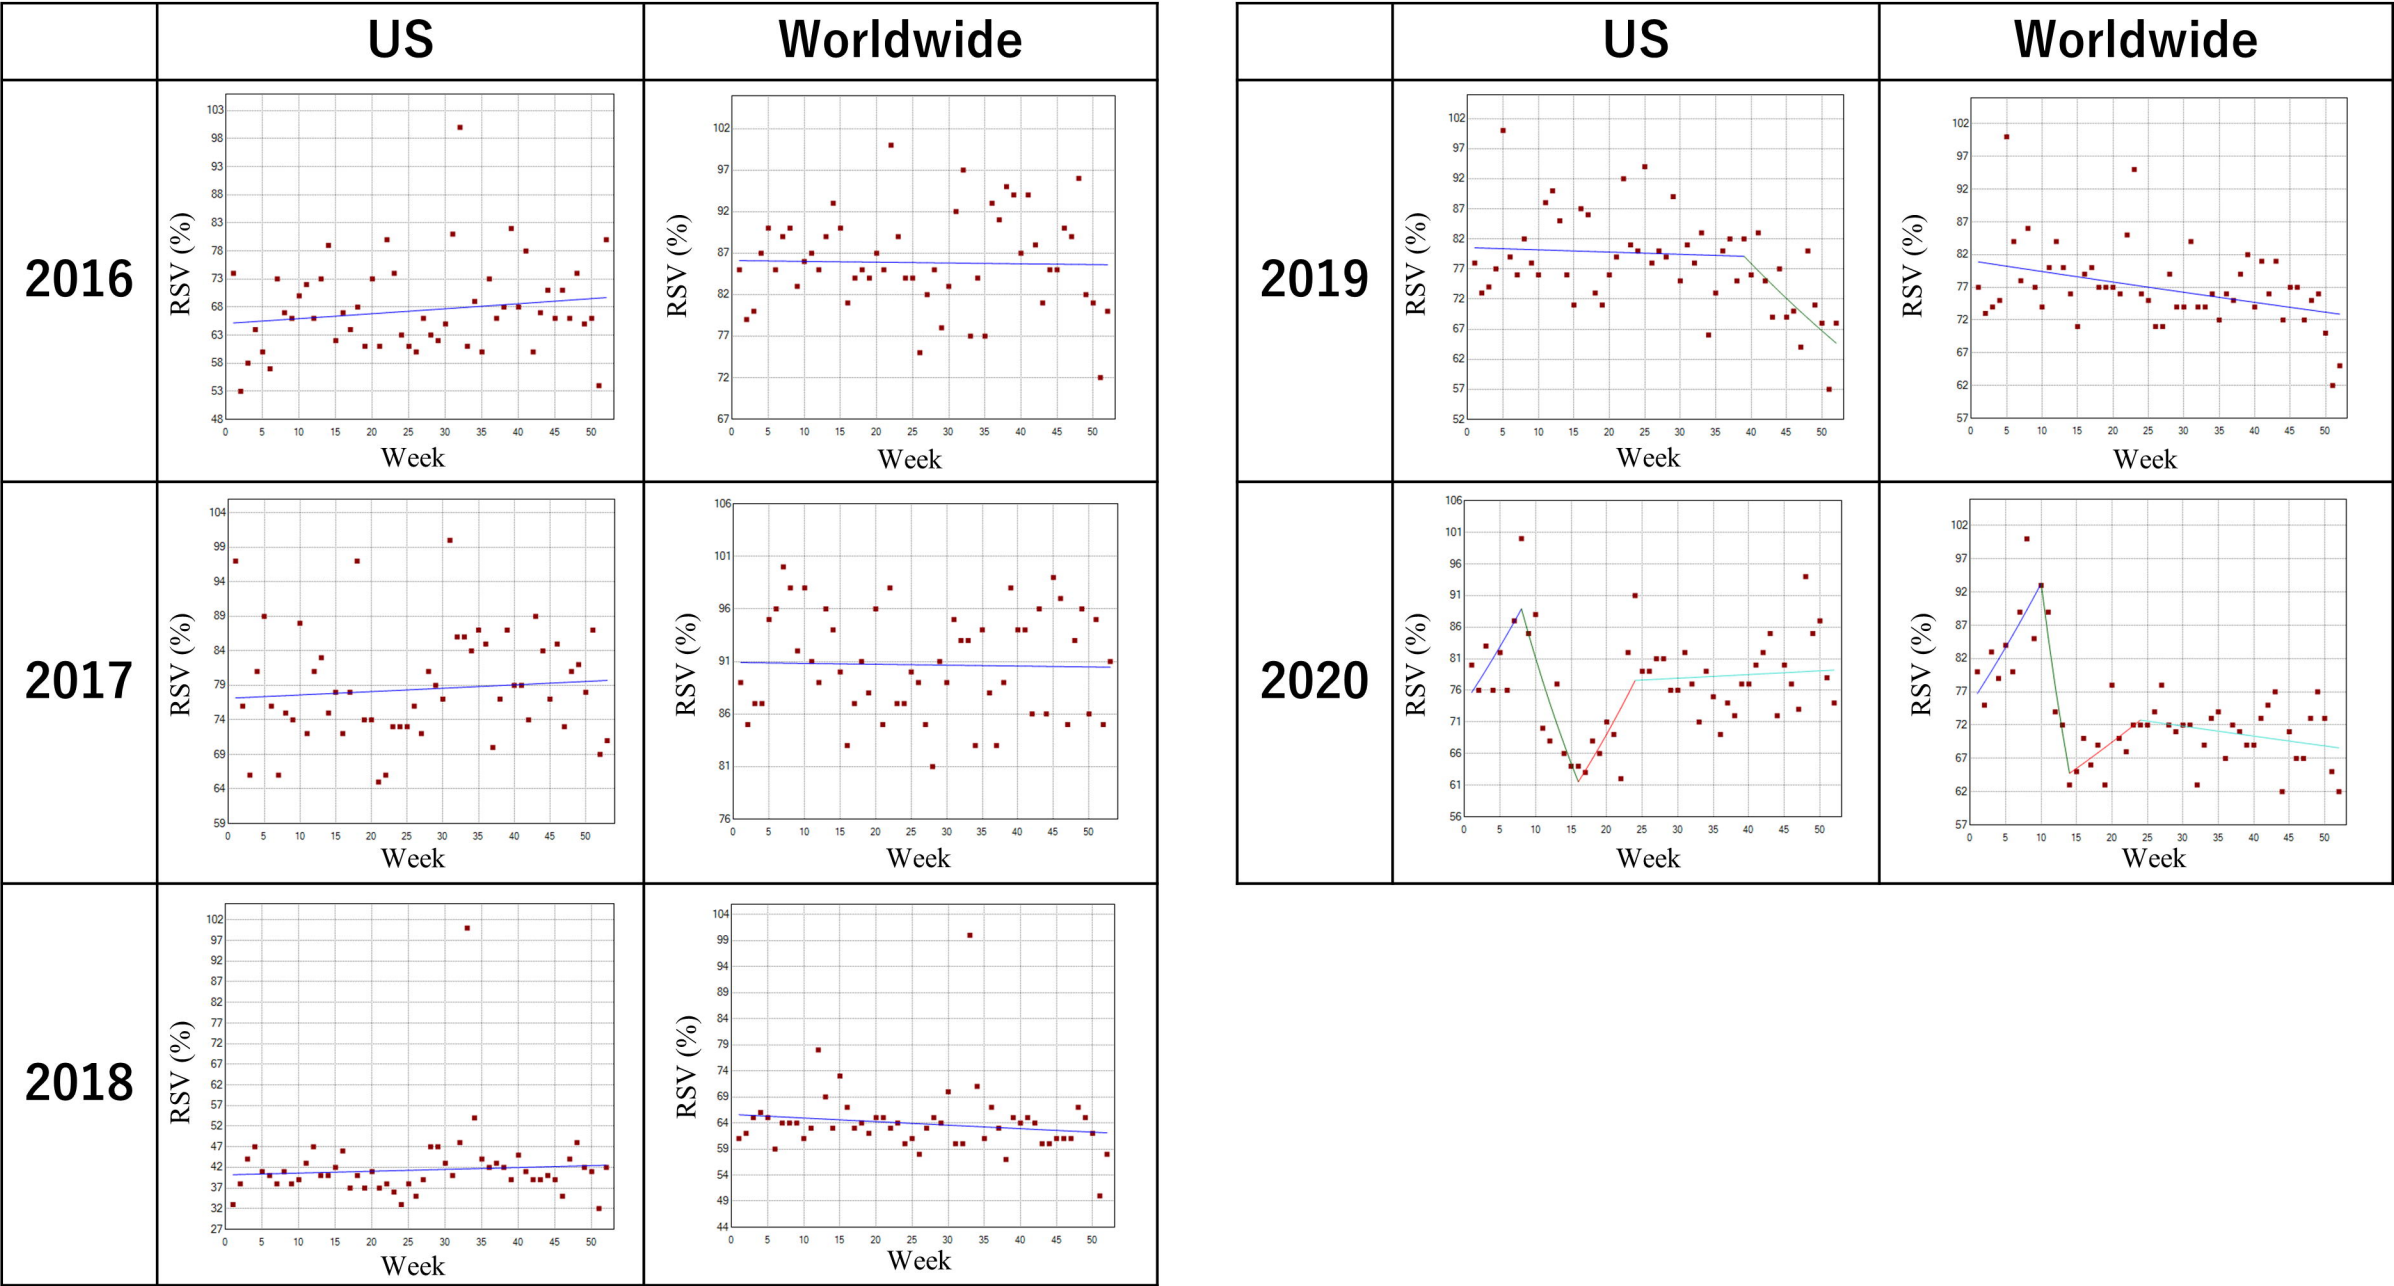

Source: https://medrxiv.org/content/10.1101/2021.08.01.21261456v1.full.pdf
